# Supplementary material for: Examining the impact of larval source management and insecticide-treated nets using a spatial agent-based model of Anopheles gambiae and a landscape generator tool
Source: PubMed Central journal article supplement (PMC3765353; doi:10.1186/1475-2875-12-290), 2013-08-21

## Simulation

## BML Density

- Low  
 Medium  
 High

## Clustering: Bloodmeal Locations

X-axis:

Y-axis:

## Clustering: Aquatic Habitats

X-axis:

Y-axis:

## Insecticide-Treated Net (ITN)

Coverage:

Repellence:

Mortality:

## Larval Source Management (LSM)

Coverage:

Landscape Boundary:  Non-absorbing  Absorbing

## Landscape Statistics

Dimension: 40 x 40  
 Boundary: NonAbsorbing  
 Human Population: 361  
 Number of BMLs: 70  
 Number of BMLs with ITN: 35  
 Number of AHs: 200  
 Number of AHs with LSM: 60

## Landscape Legends

-  Bloodmeal Location (BML)  
 BML with ITN coverage  
 Aquatic Habitat (AH)  
 AH with LSM coverage

Save

Update

Landscape Name: AH200-BML70-SRC0.3-C0.5-R0.2-M0.0

## Landscape

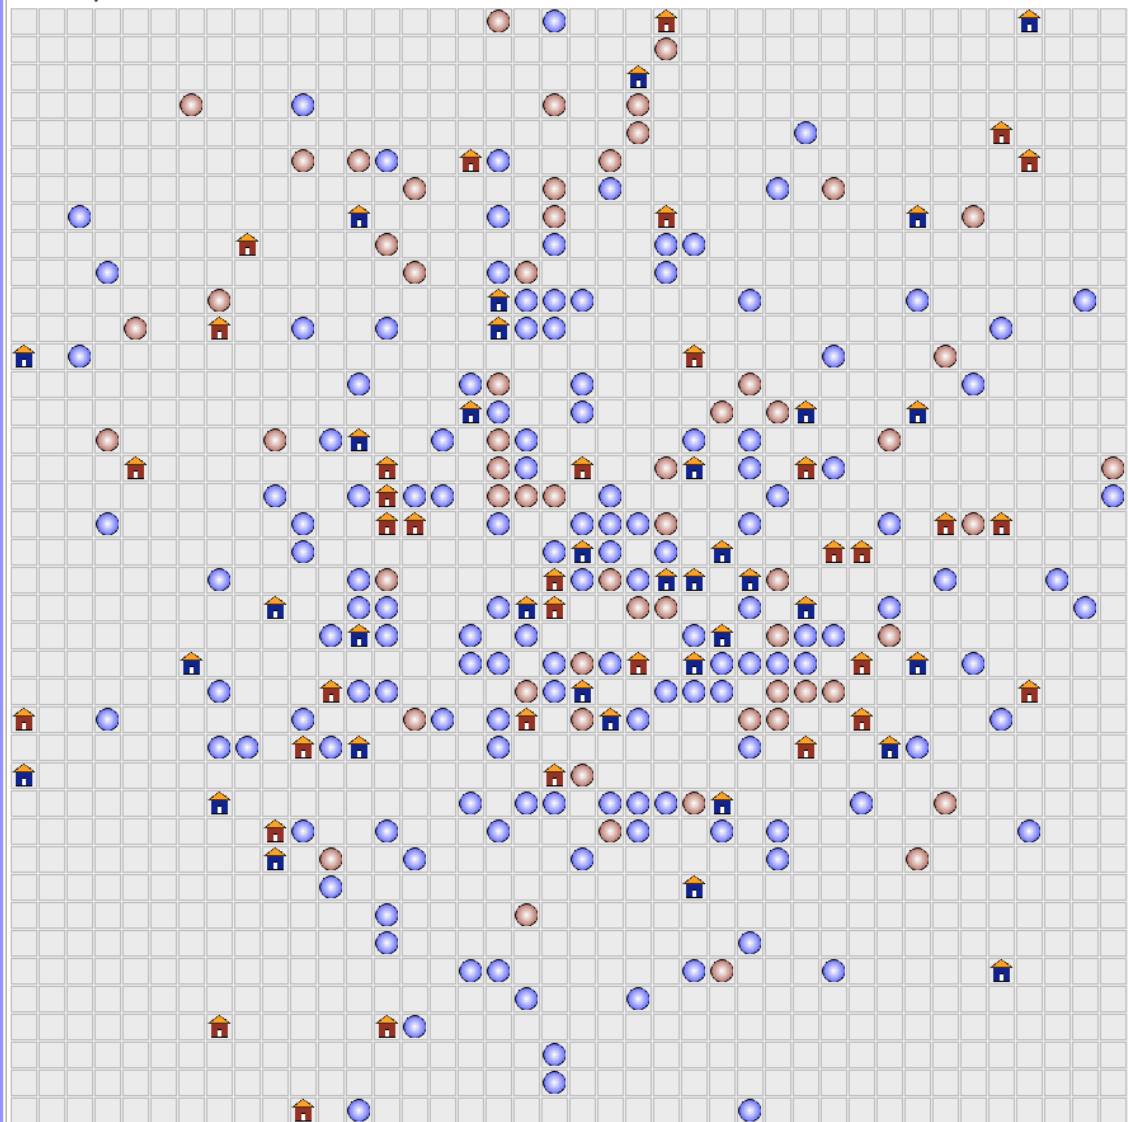

Supplement: 1475-2875-12-290-S4.pdf [file 1475-2875-12-290-S4.pdf]
