# Supplementary material for: Examining the impact of larval source management and insecticide-treated nets using a spatial agent-based model of Anopheles gambiae and a landscape generator tool
Source: PubMed Central journal article supplement (PMC3765353; doi:10.1186/1475-2875-12-290), 2013-08-21

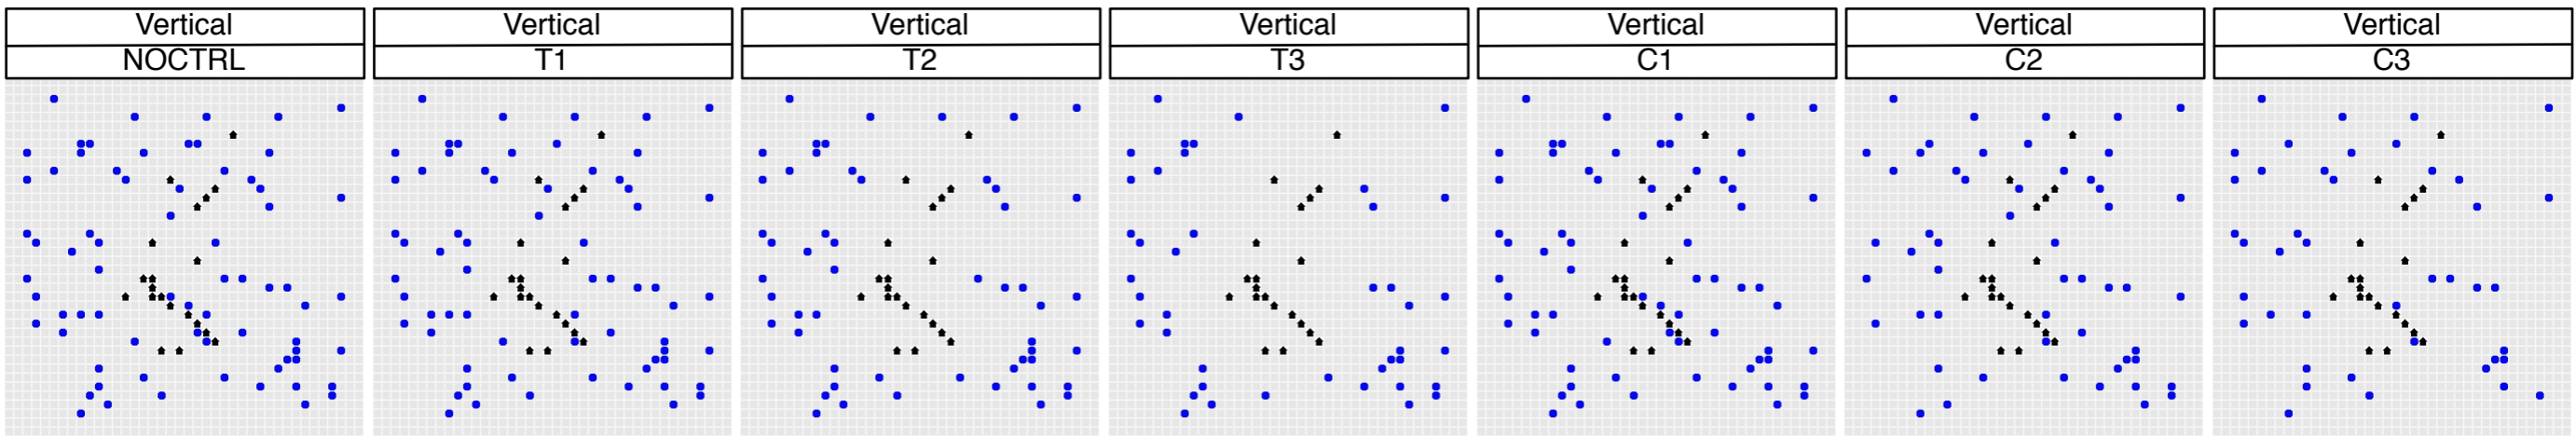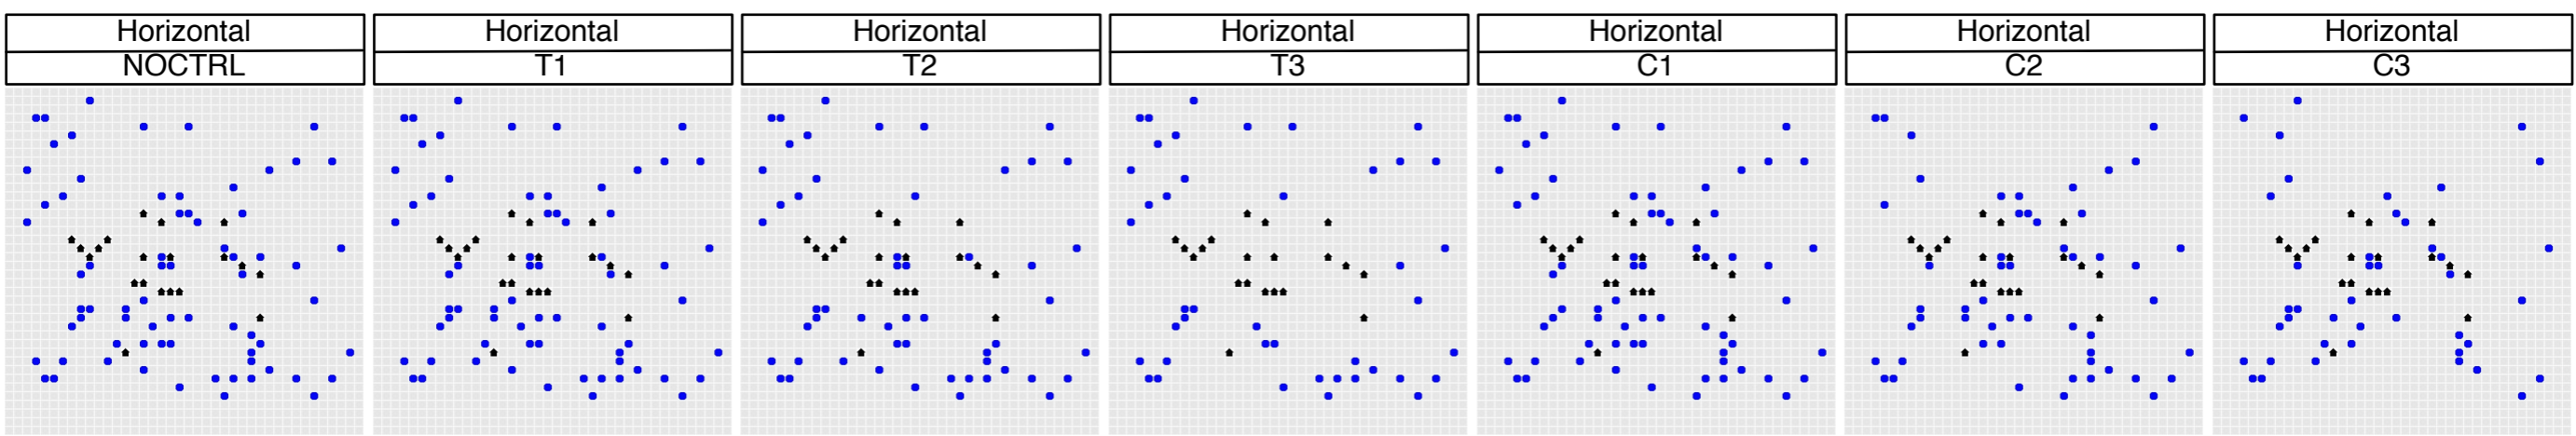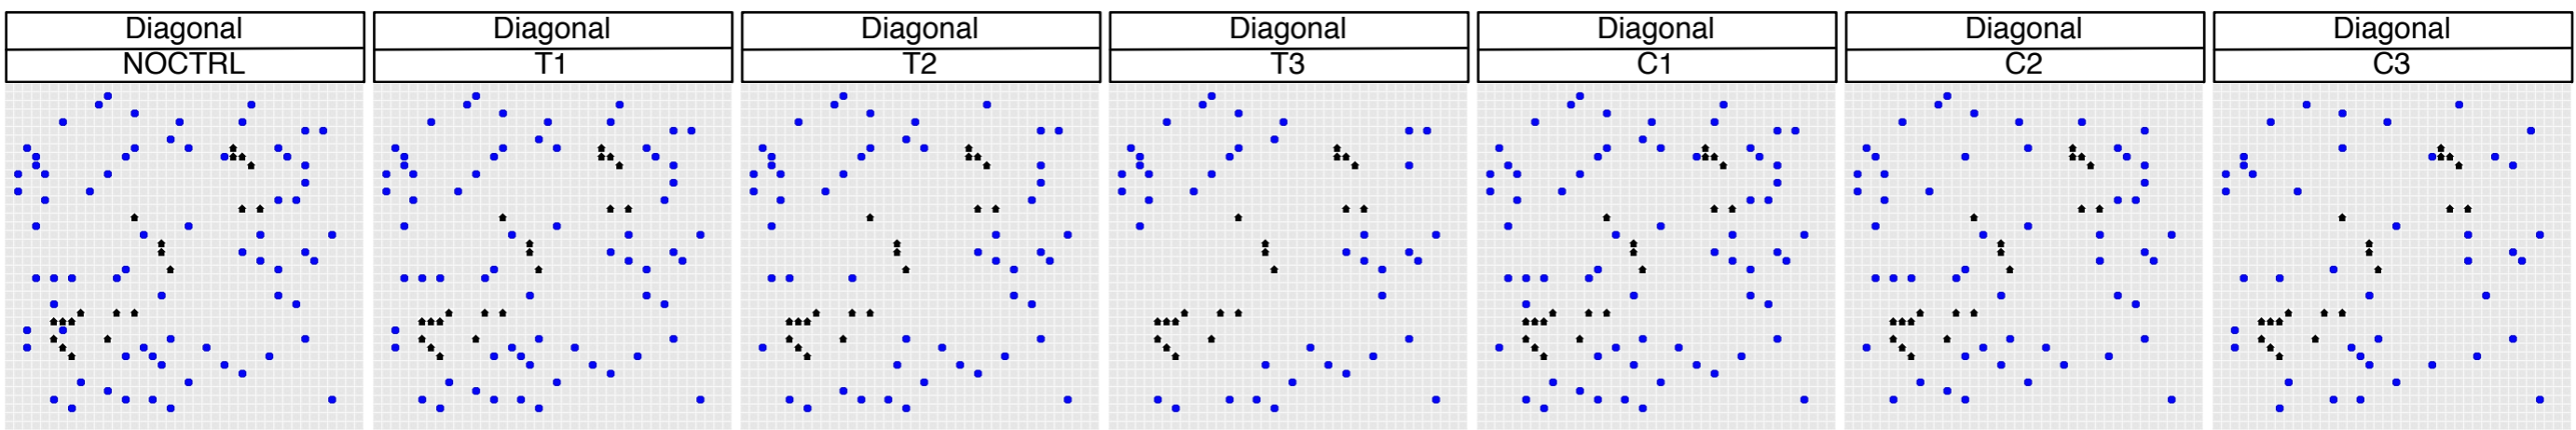

Supplement: 1475-2875-12-290-S5.pdf [file 1475-2875-12-290-S5.pdf]
