# Supplementary material for: Examining the impact of larval source management and insecticide-treated nets using a spatial agent-based model of Anopheles gambiae and a landscape generator tool
Source: PubMed Central journal article supplement (PMC3765353; doi:10.1186/1475-2875-12-290), 2013-08-21
Supplement: 1475-2875-12-290-S11.pdf [file 1475-2875-12-290-S11.pdf]

R = 0.2

R = 0.5

R = 0.9

(1)

(2)

(3)

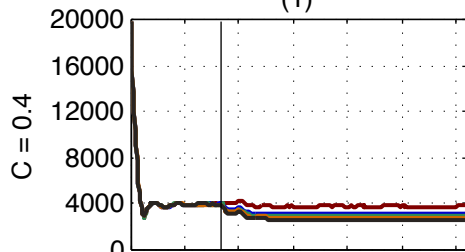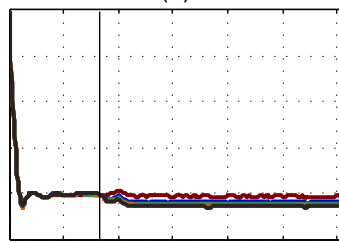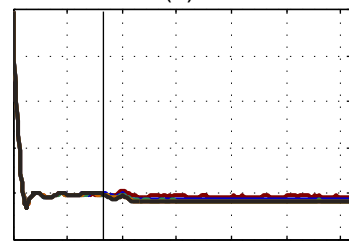

(4)

(5)

(6)

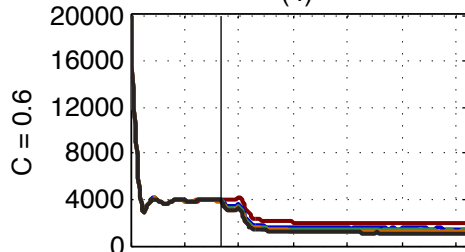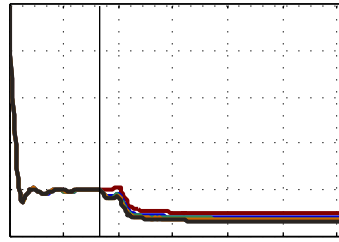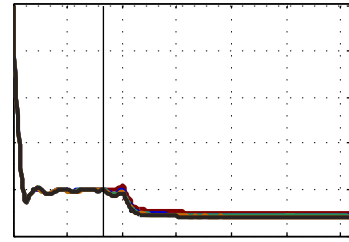

(7)

(8)

(9)

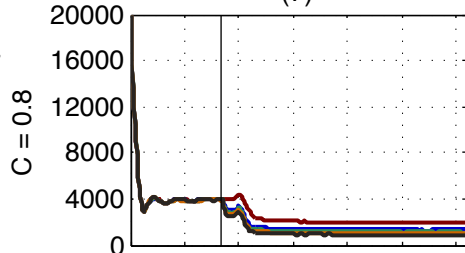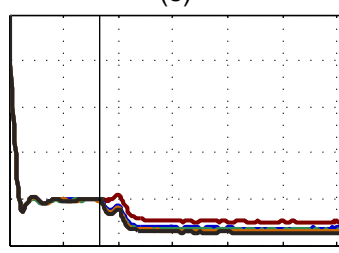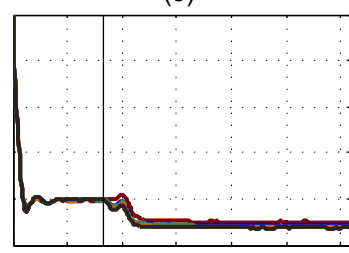

(10)

(11)

(12)

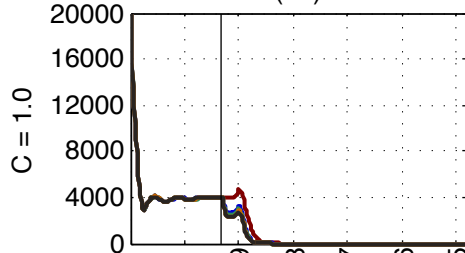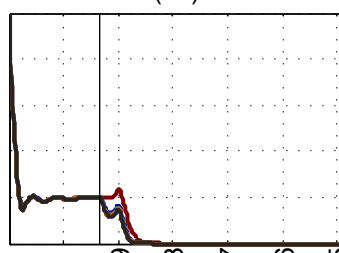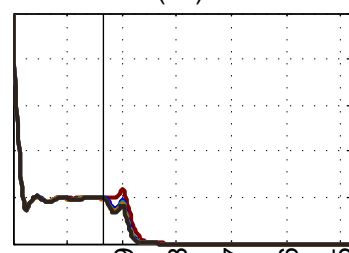

Mosquito Abundance

Time (Day)

— M = 0.0 — M = 0.25 — M = 0.5 — M = 0.75 — M = 1.0
